# Supplementary material for: Stunting, adiposity, and the individual-level “dual burden” among urban lowland and rural highland peruvian children
Source: PubMed Central journal article supplement (PMC4312888; doi:10.1002/ajhb.22551), 2014-04-07

## Supplementary Information

**Supplementary Table 1. Sample size and summary statistics by age and study site for height-, weight- and BMI-for-age z scores (WHO Multicentre Growth Reference Study Group 2006; de Onis and others 2007) and WCHtR.**

| Age (years) |                       | Lowland        |                |             |       | Highland       |                |             |       |
|-------------|-----------------------|----------------|----------------|-------------|-------|----------------|----------------|-------------|-------|
|             |                       | Height z score | Weight z score | BMI z score | WCHtR | Height z score | Weight z score | BMI z score | WCHtR |
| 0.5-1.99    | <b>Mean</b>           | 0.0            | 0.3            | 0.4         | 0.6   | -1.9           | -1.1           | 0.0         | 0.6   |
|             | <b>SD<sup>a</sup></b> | 1.02           | 0.9            | 0.84        | 0.04  | 0.78           | 0.6            | 0.85        | 0.02  |
|             | <b>n</b>              | 44             | 44             | 44          | 35    | 43             | 43             | 43          | 7     |
| 2.0-8.5     | <b>Mean</b>           | -0.4           | 0.4            | 0.8         | 0.5   | -2.1           | -1.3           | 0.2         | 0.5   |
|             | <b>SD</b>             | 0.81           | 1.05           | 1.07        | 0.05  | 0.96           | 0.84           | 0.7         | 0.04  |
|             | <b>n</b>              | 139            | 137            | 137         | 130   | 118            | 118            | 118         | 104   |
| 9.5-14.5    | <b>Mean</b>           | -0.6           | 0.8            | 1.0         | 0.5   | -1.8           | -1.1           | -0.3        | 0.5   |
|             | <b>SD</b>             | 0.97           | 1.09           | 0.98        | 0.05  | 0.64           | 0.63           | 0.75        | 0.03  |
|             | <b>n</b>              | 60             | 15             | 60          | 60    | 37             | 12             | 37          | 30    |

<sup>a</sup> SD = standard deviation.

Sample sizes vary for individual measurements due to missing data points. Data are for combined sexes.

## Supplementary Figures

Supplementary Figure 1. Map of Peru showing location of study communities

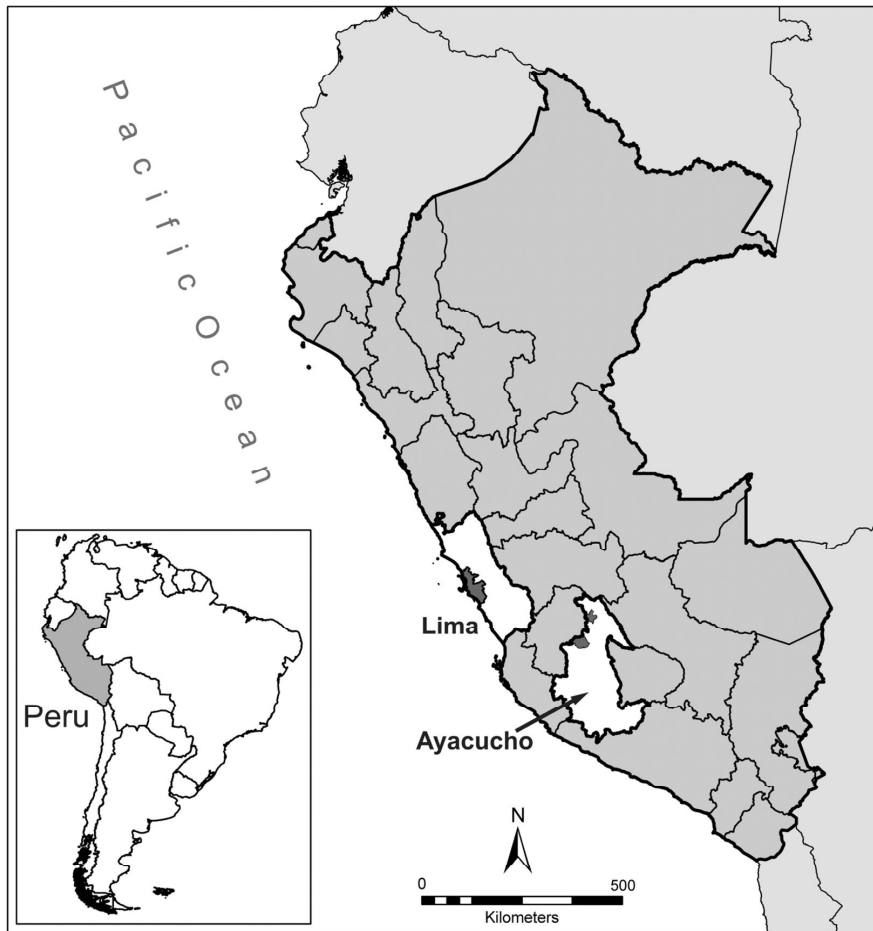

Supplementary Figure 2. Stunting rates by sample and age according to WHO criteria and growth standards/references

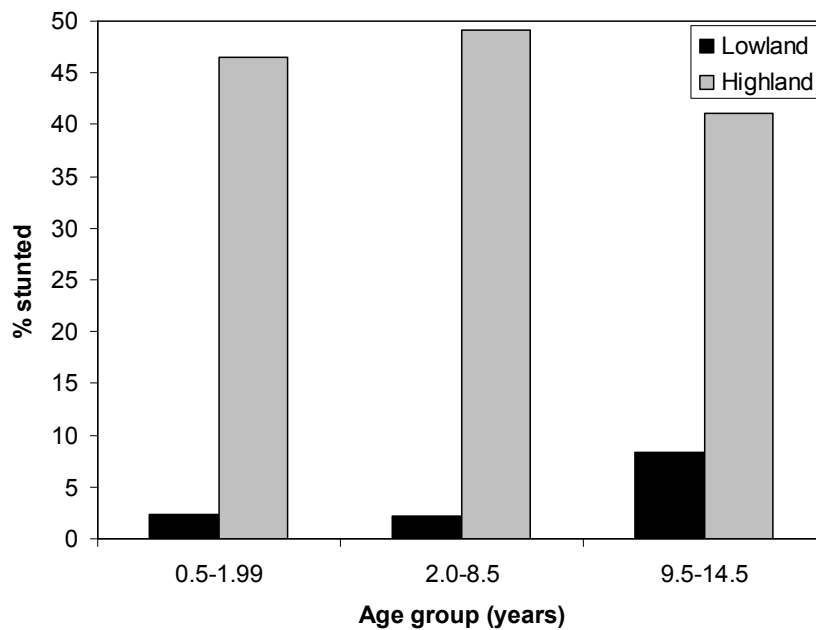

**Supplementary Figure 3. Percentage of children in each IOTF BMI-for-age category from the age of 2 years in the lowland and highland samples**

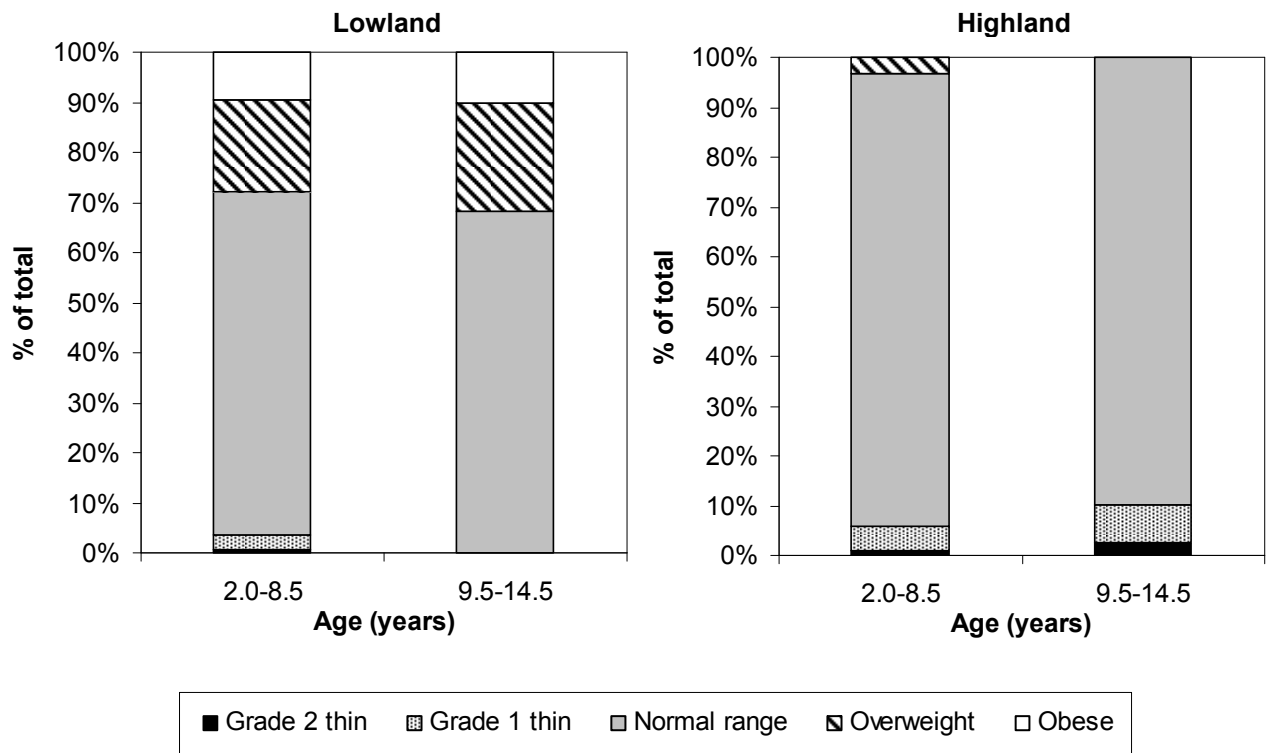

**Supplementary Figure 4. Proportion of lowland and highland children with waist circumference: height ratio over 0.5 by age group**

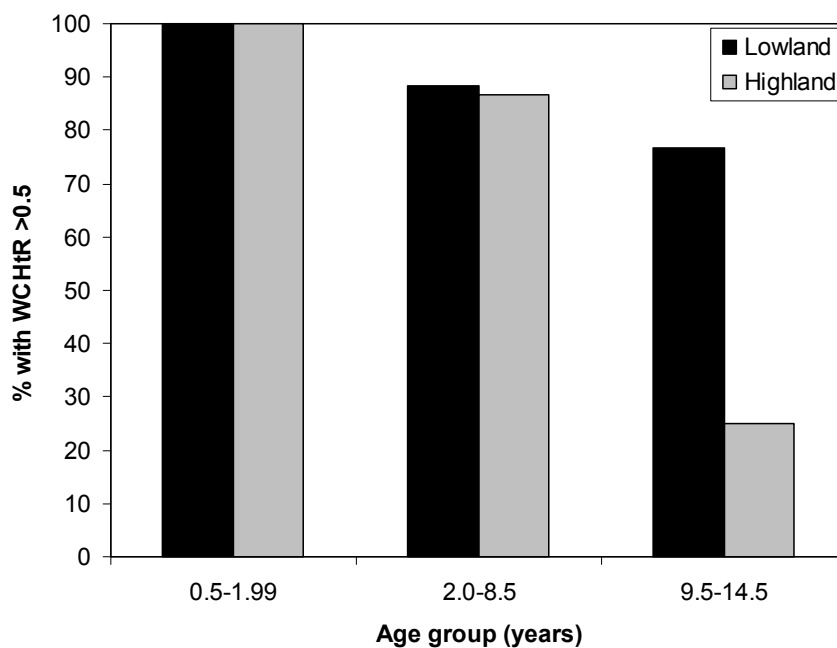

Supplement: ajhb0026-0481-sd2.pdf [file ajhb0026-0481-sd2.pdf]
